# Supplementary material for: FinnGen: Unique genetic insights from combining isolated population and national health register data
Source: bioRxiv or medRxiv preprint supplement (doi:10.1101/2022.03.03.22271360), 2022-03-06

# C3\_BREAST\_EXALLC

R2: 0.82 , slope: 0.812

R2 (weighted): 0.84 , slope: 0.874

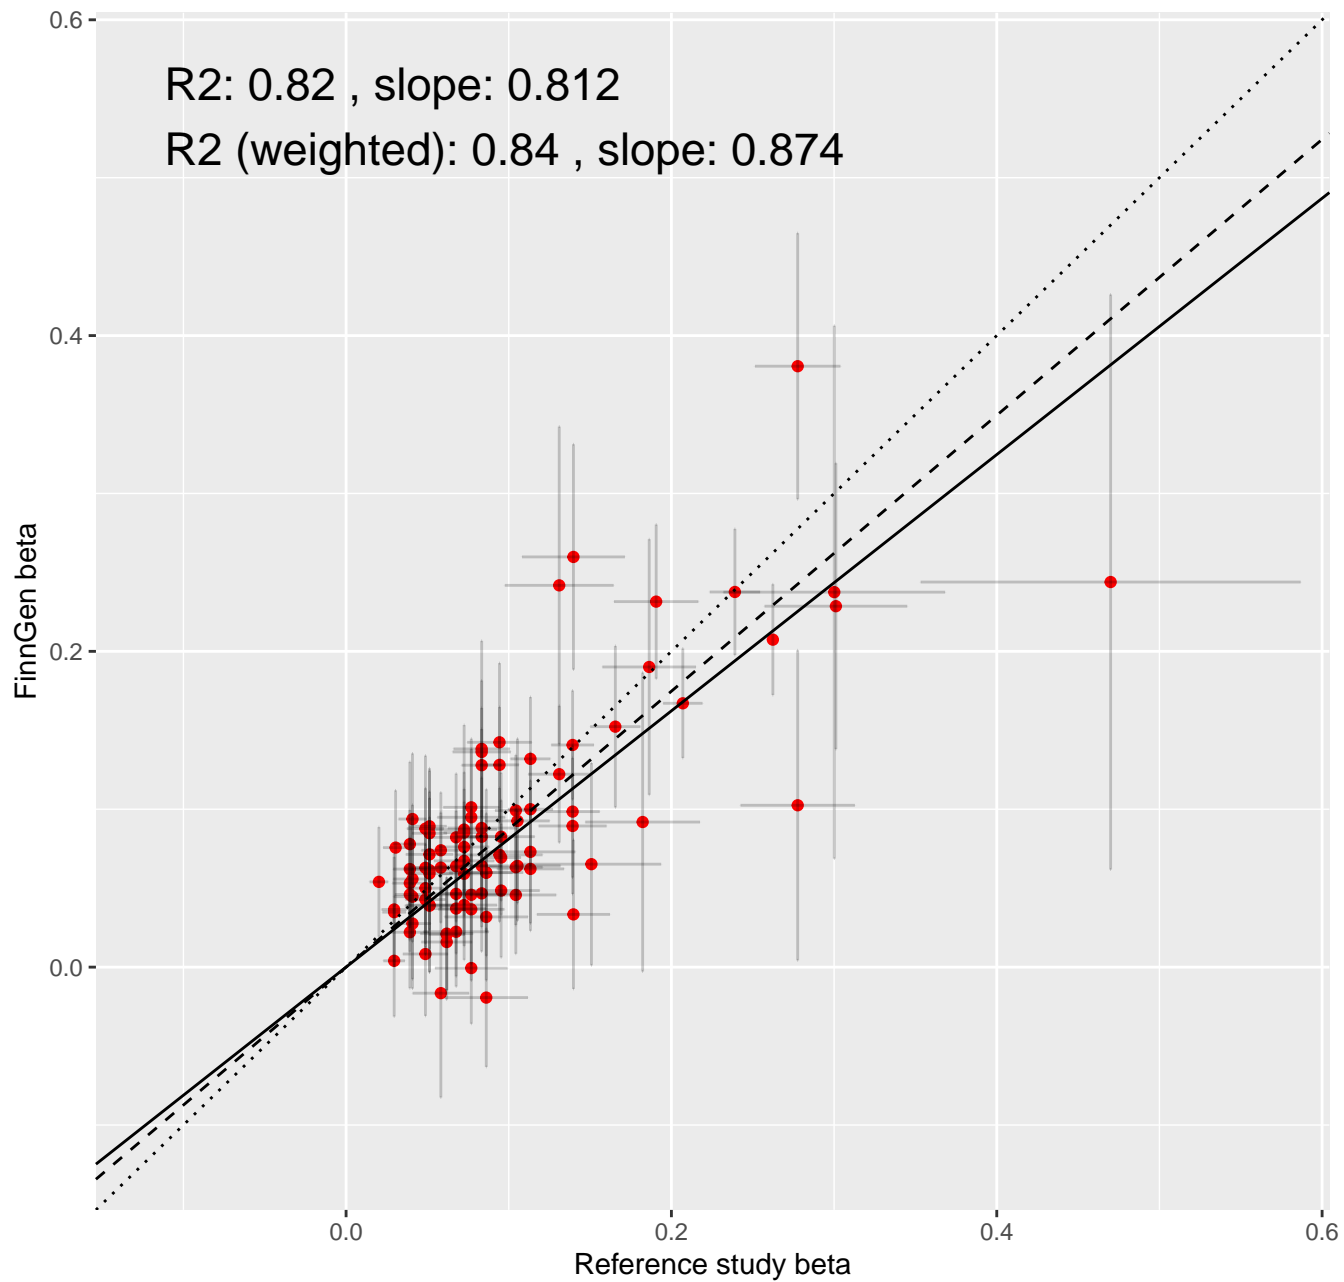

## C3\_PROSTATE\_EXALLC

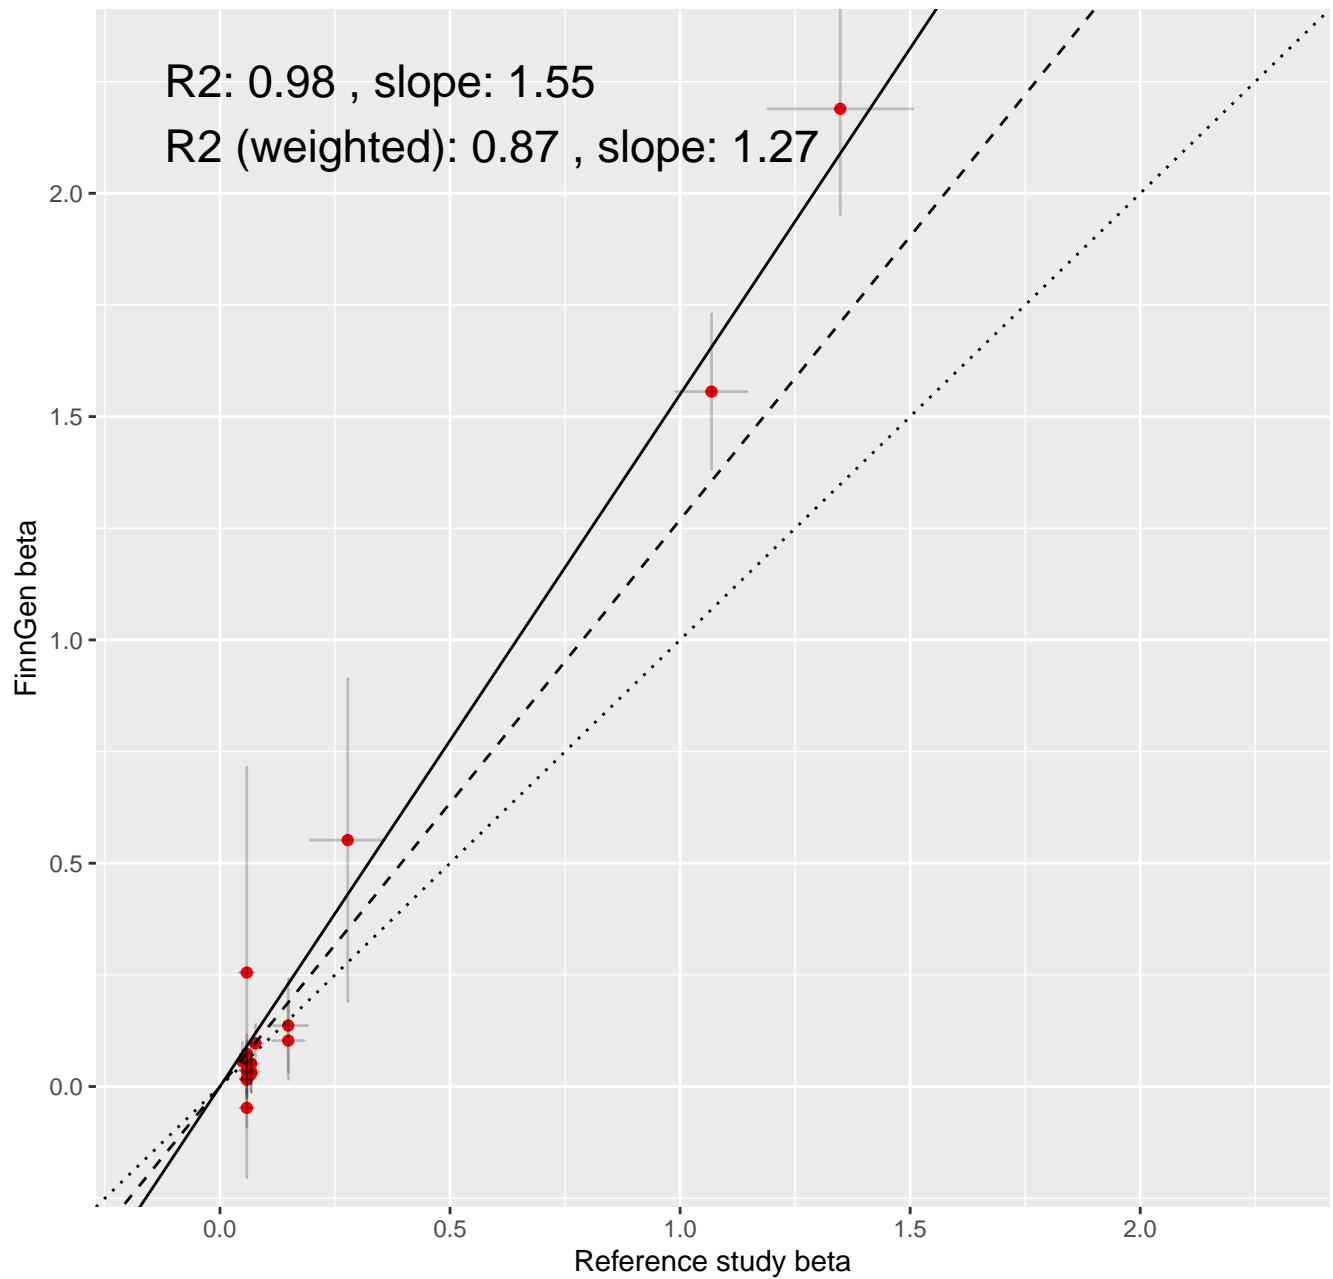

# G6\_AD\_WIDE

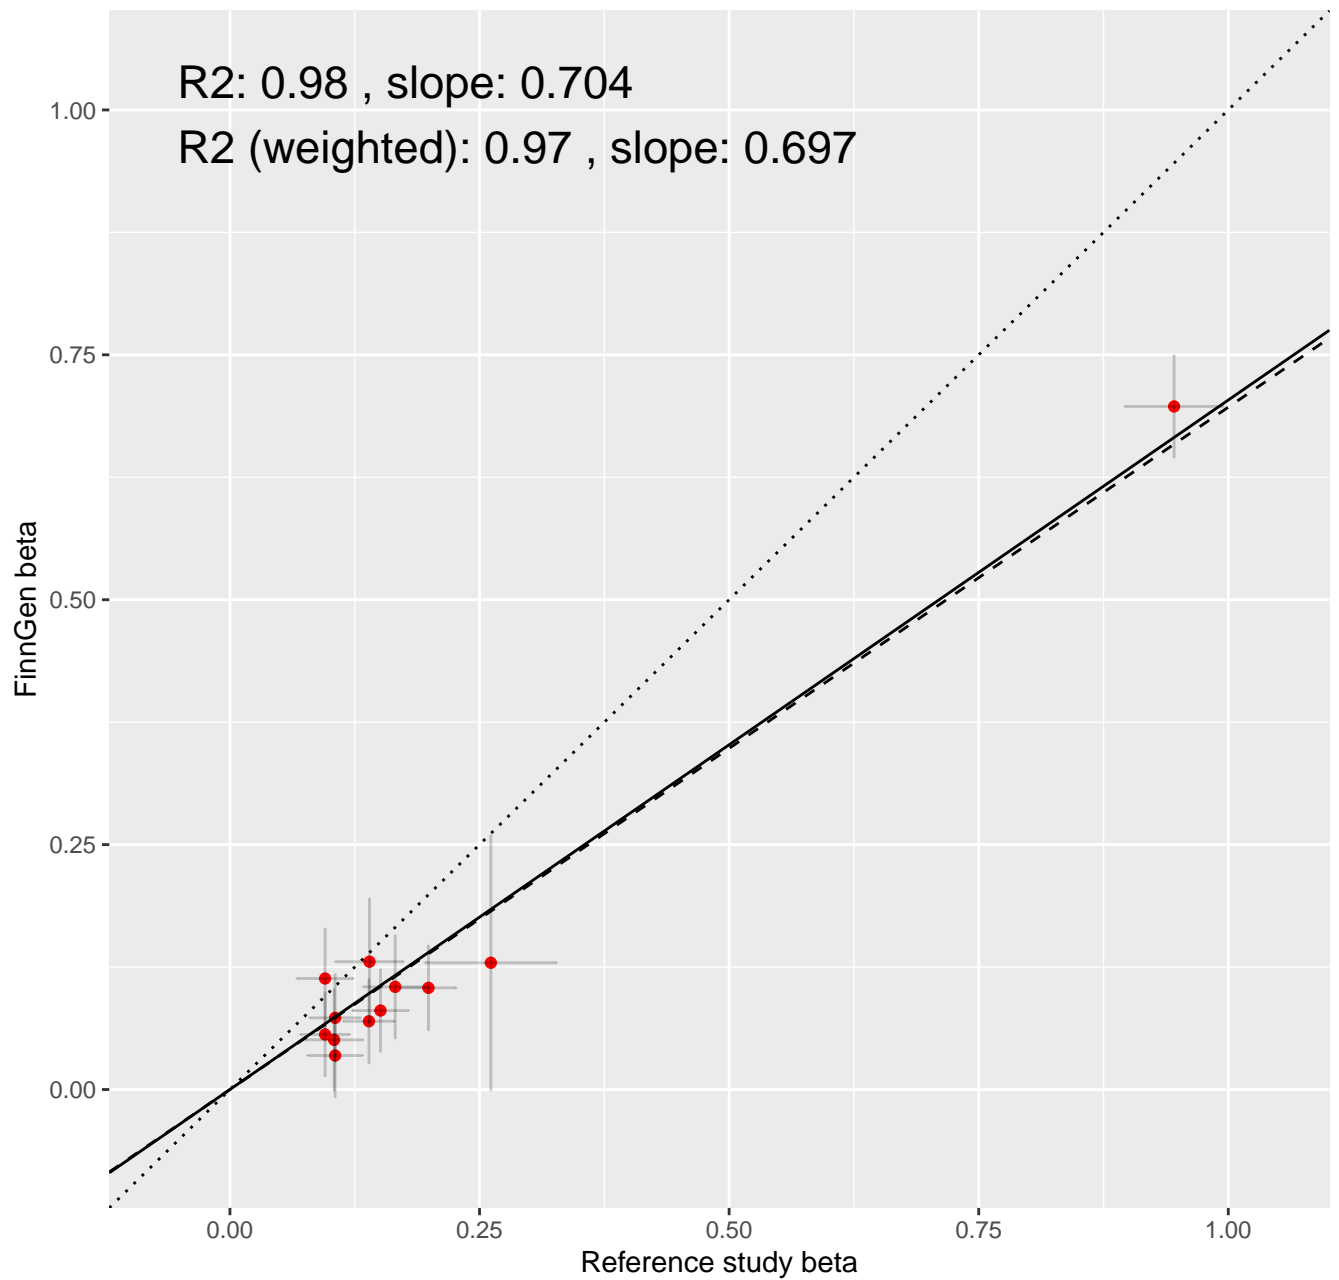

## H7\_AMD

R2: 0.94 , slope: 0.694

R2 (weighted): 0.96 , slope: 0.651

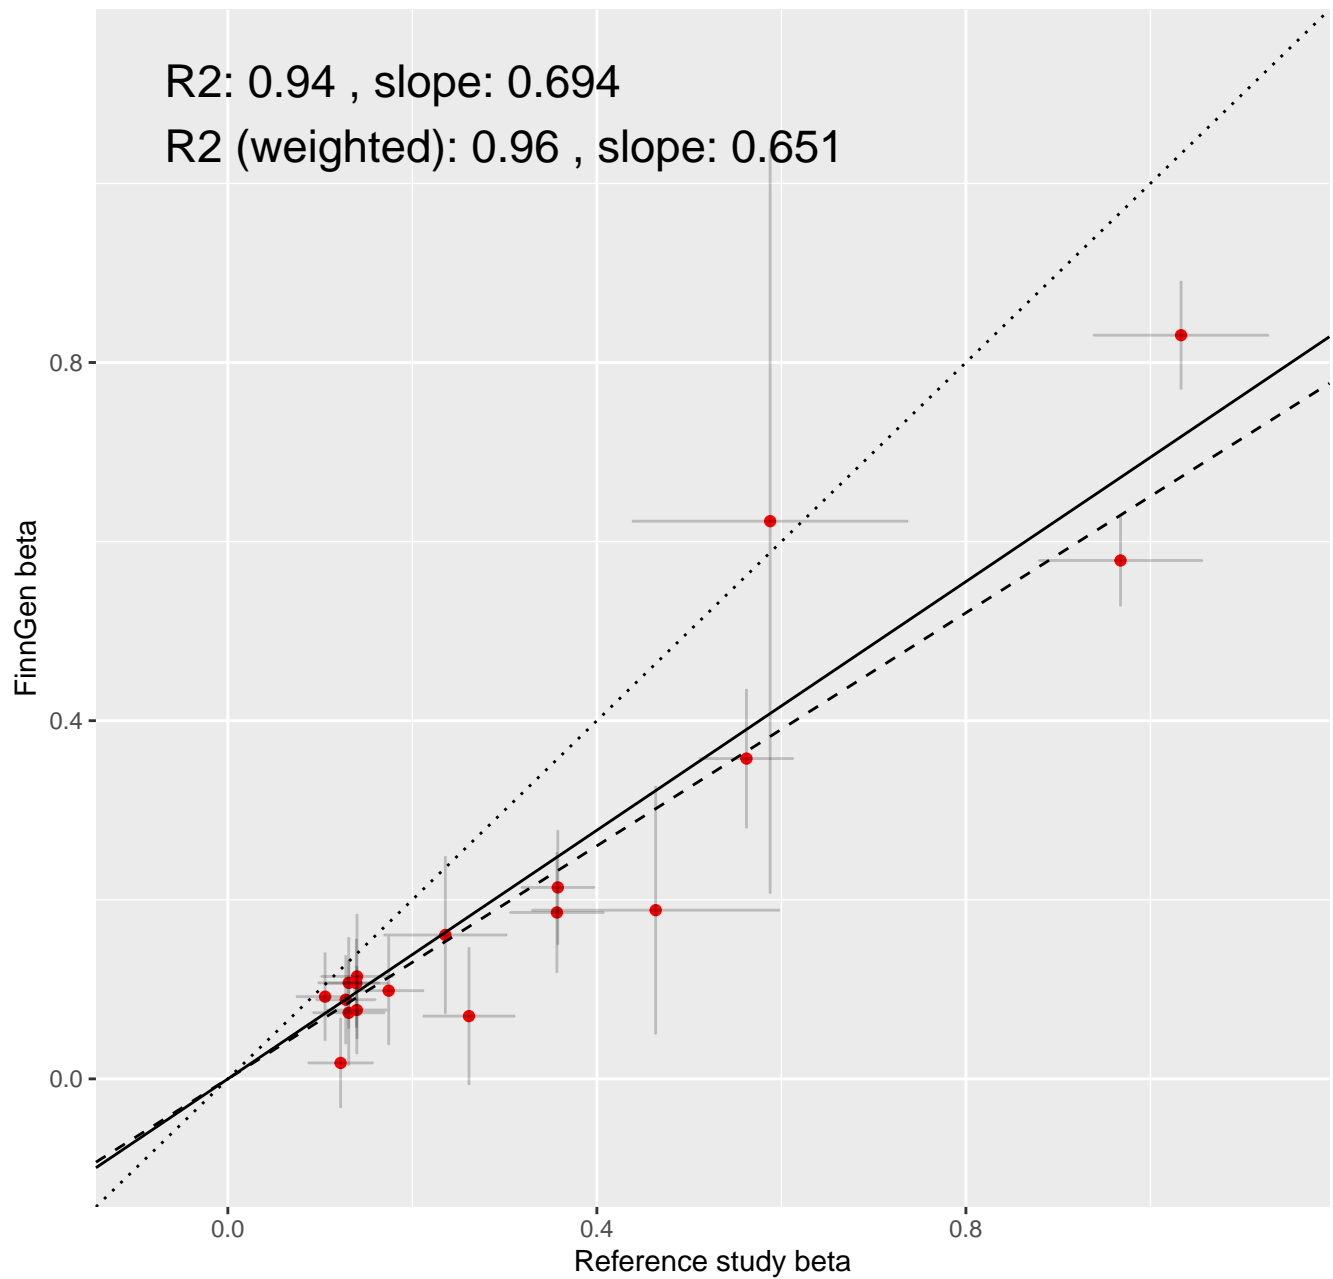

# H7\_GLAUCPRIMOPEN

R2: 0.92 , slope: 0.836

R2 (weighted): 0.91 , slope: 0.861

FinnGen beta

0.4

0.2

0.0

0.0

0.2

0.4

Reference study beta

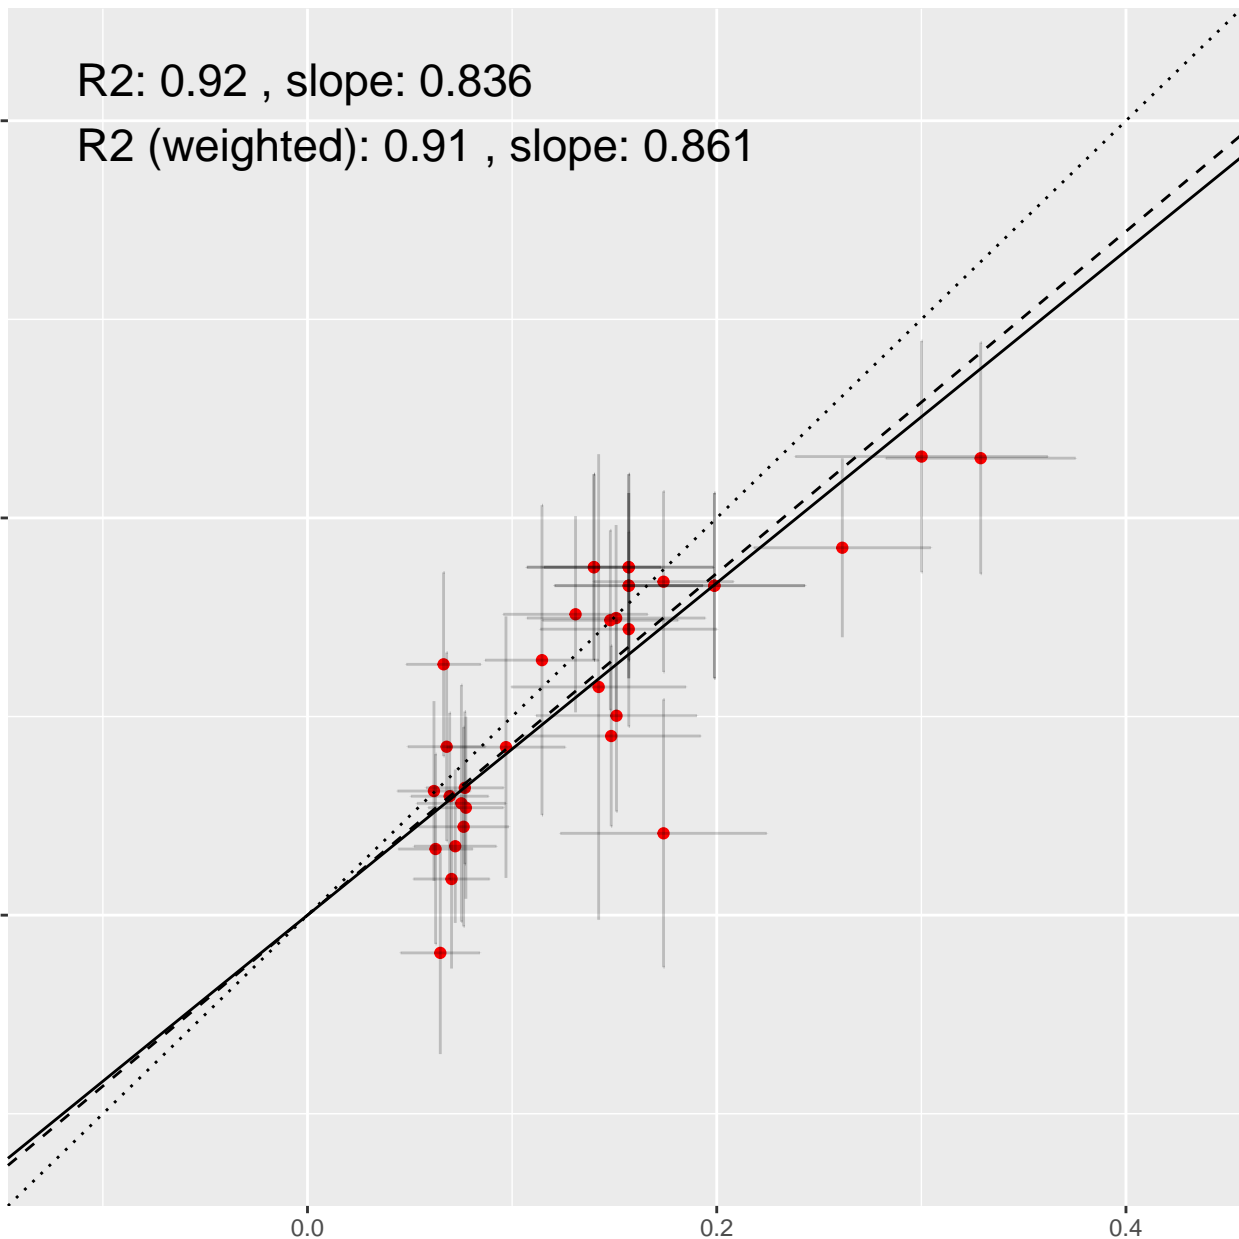

## I9\_AF

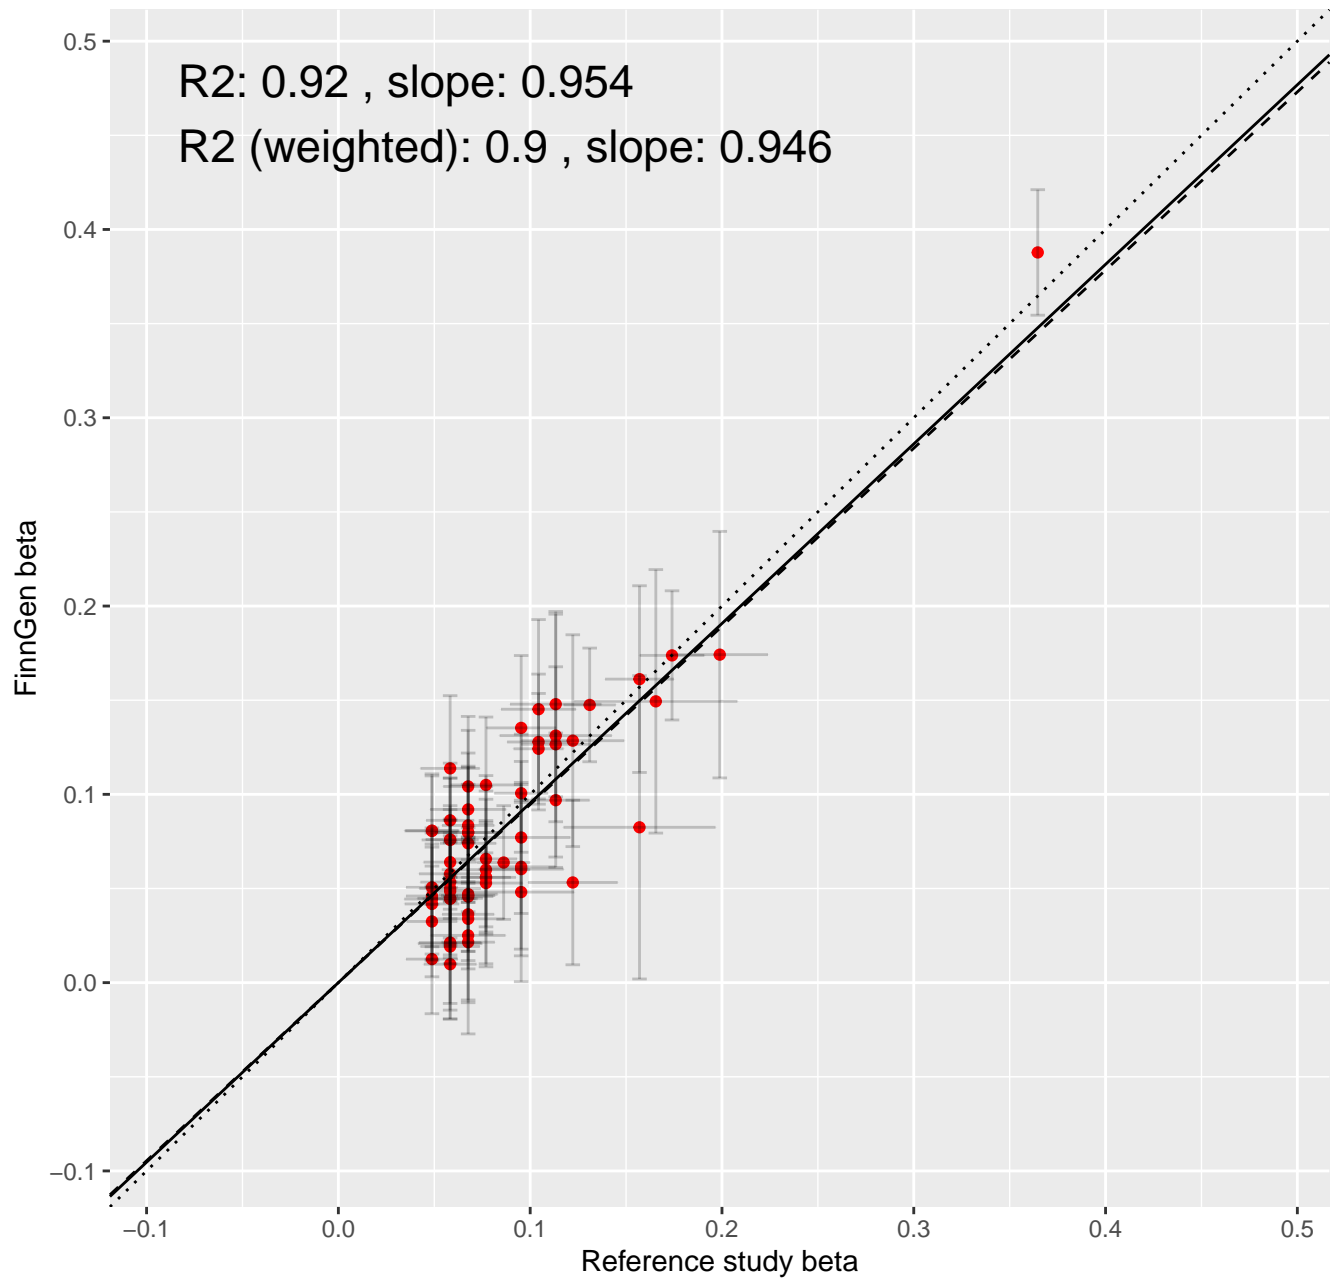

# I9\_MI\_STRICT

R2: 0.96 , slope: 1.08

R2 (weighted): 0.95 , slope: 1.08

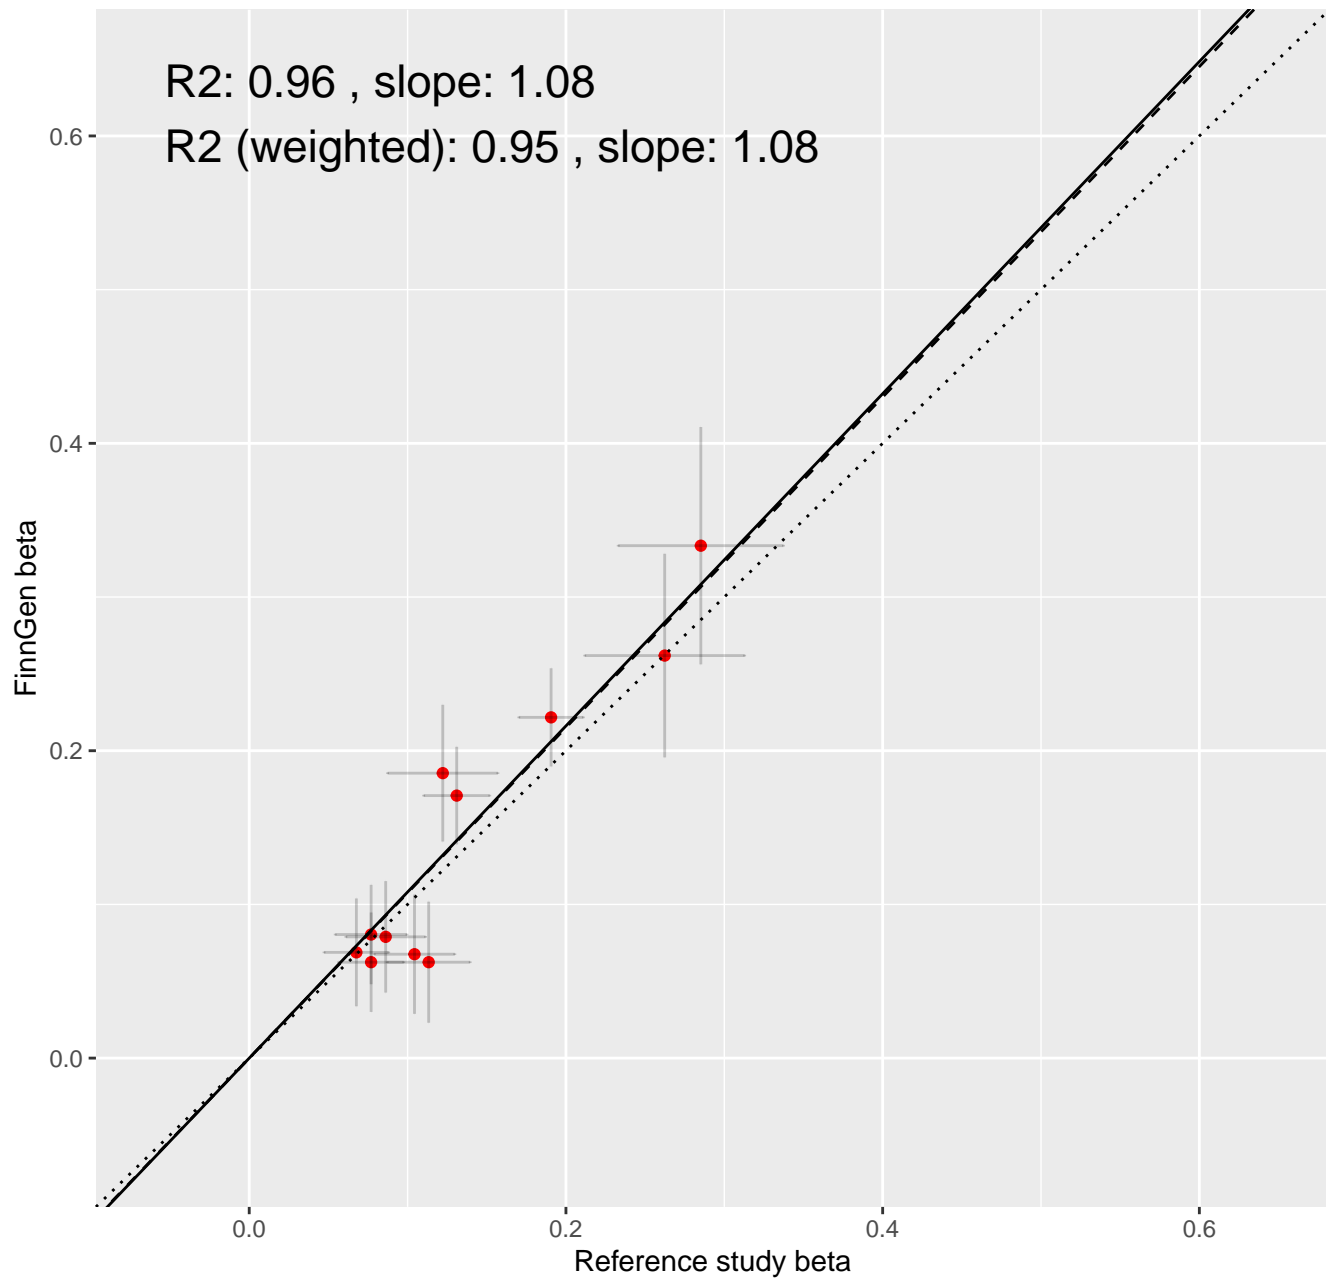

# K11\_IBD\_STRICT

R2: 0.78 , slope: 0.534

R2 (weighted): 0.79 , slope: 0.623

FinnGen beta

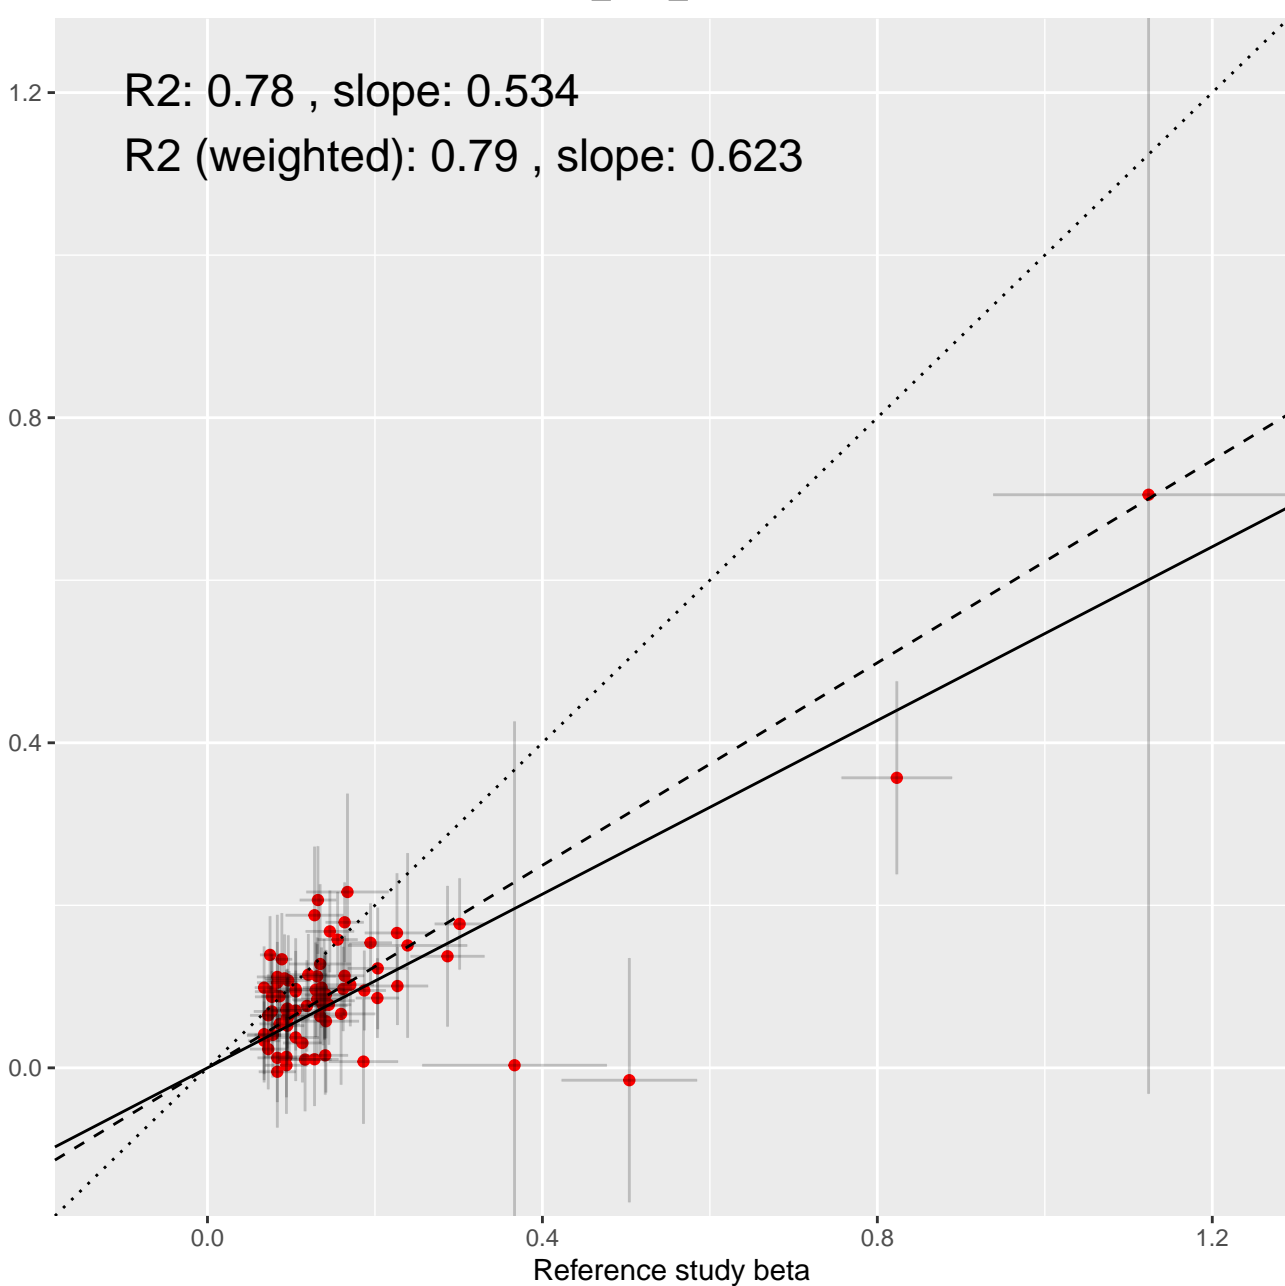



# J10\_ASTHMA

R2: 0.94 , slope: 0.798

R2 (weighted): 0.93 , slope: 0.764

FinnGen beta

0.2

0.1

0.0

0.0

0.1

0.2

Reference study beta

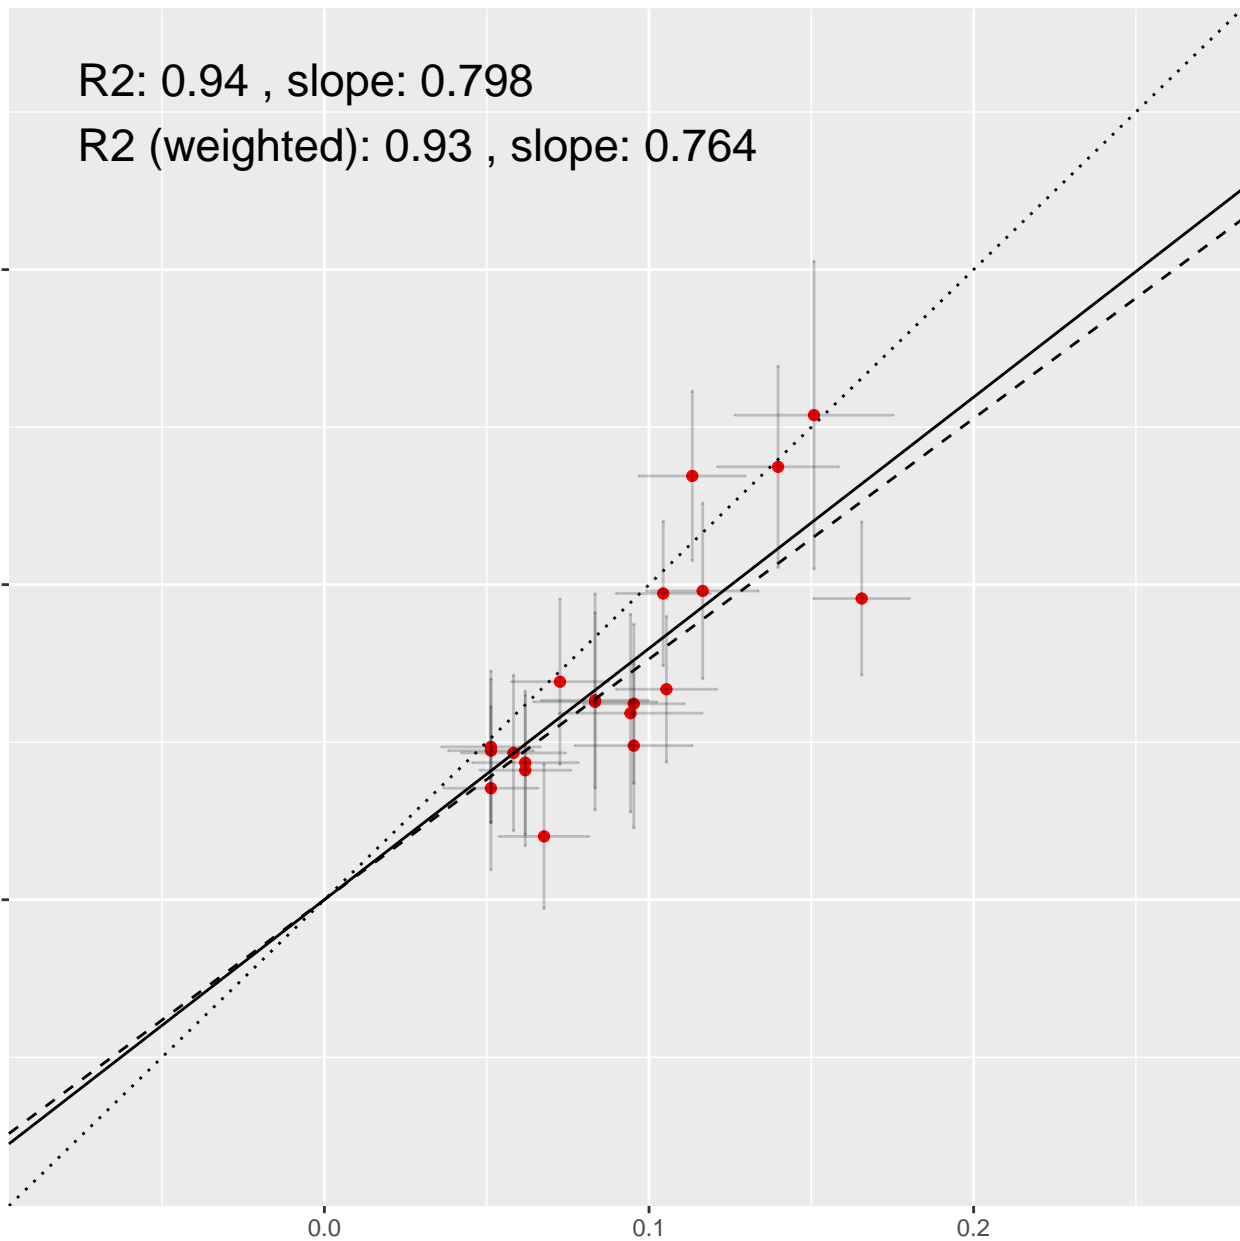

## L12\_ATOPIC

R2: 0.98 , slope: 1.25

R2 (weighted): 0.91 , slope: 1.23

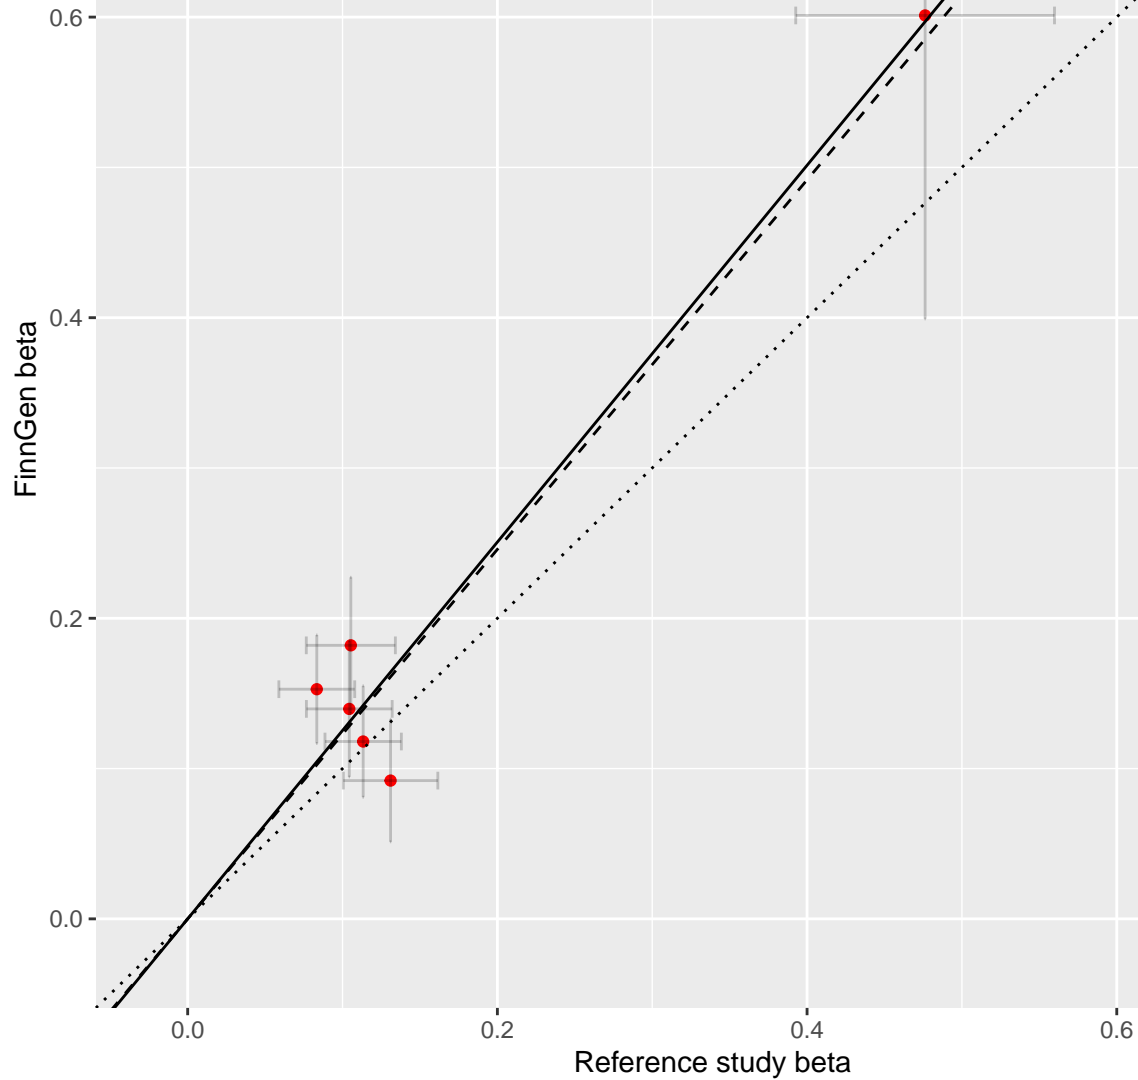

# L12\_PSORIASIS

R2: 0.92 , slope: 0.686

R2 (weighted): 0.92 , slope: 0.672

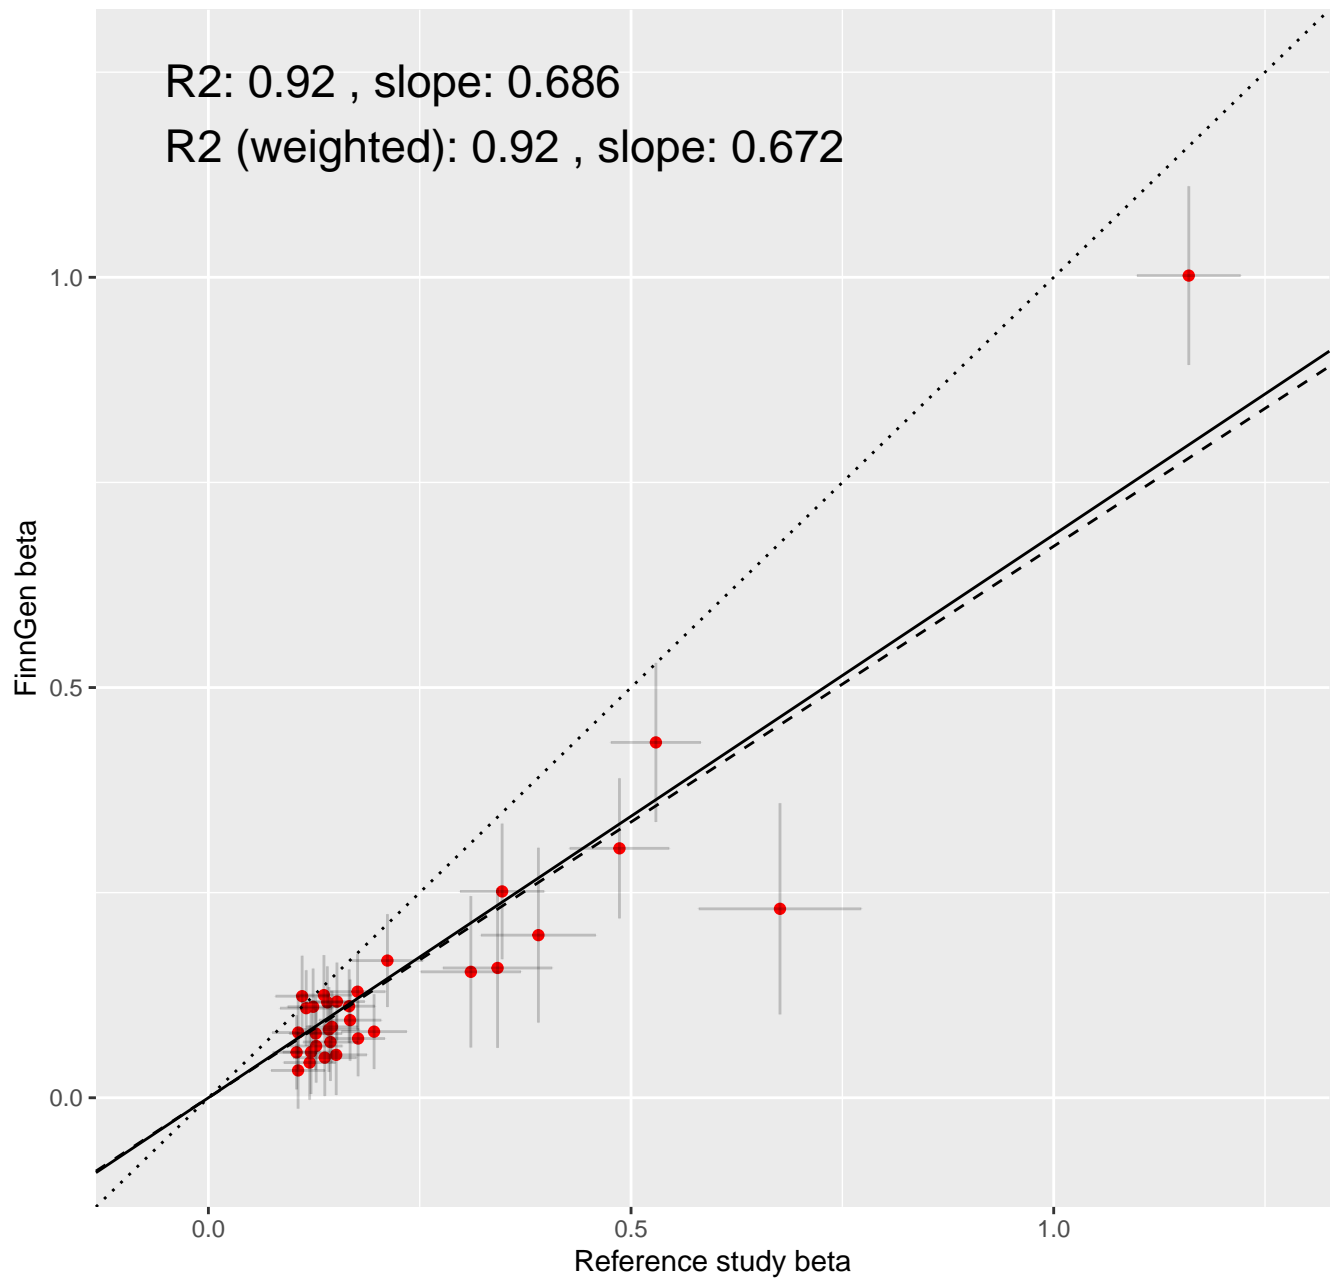

## M13\_ANKYLOSPON

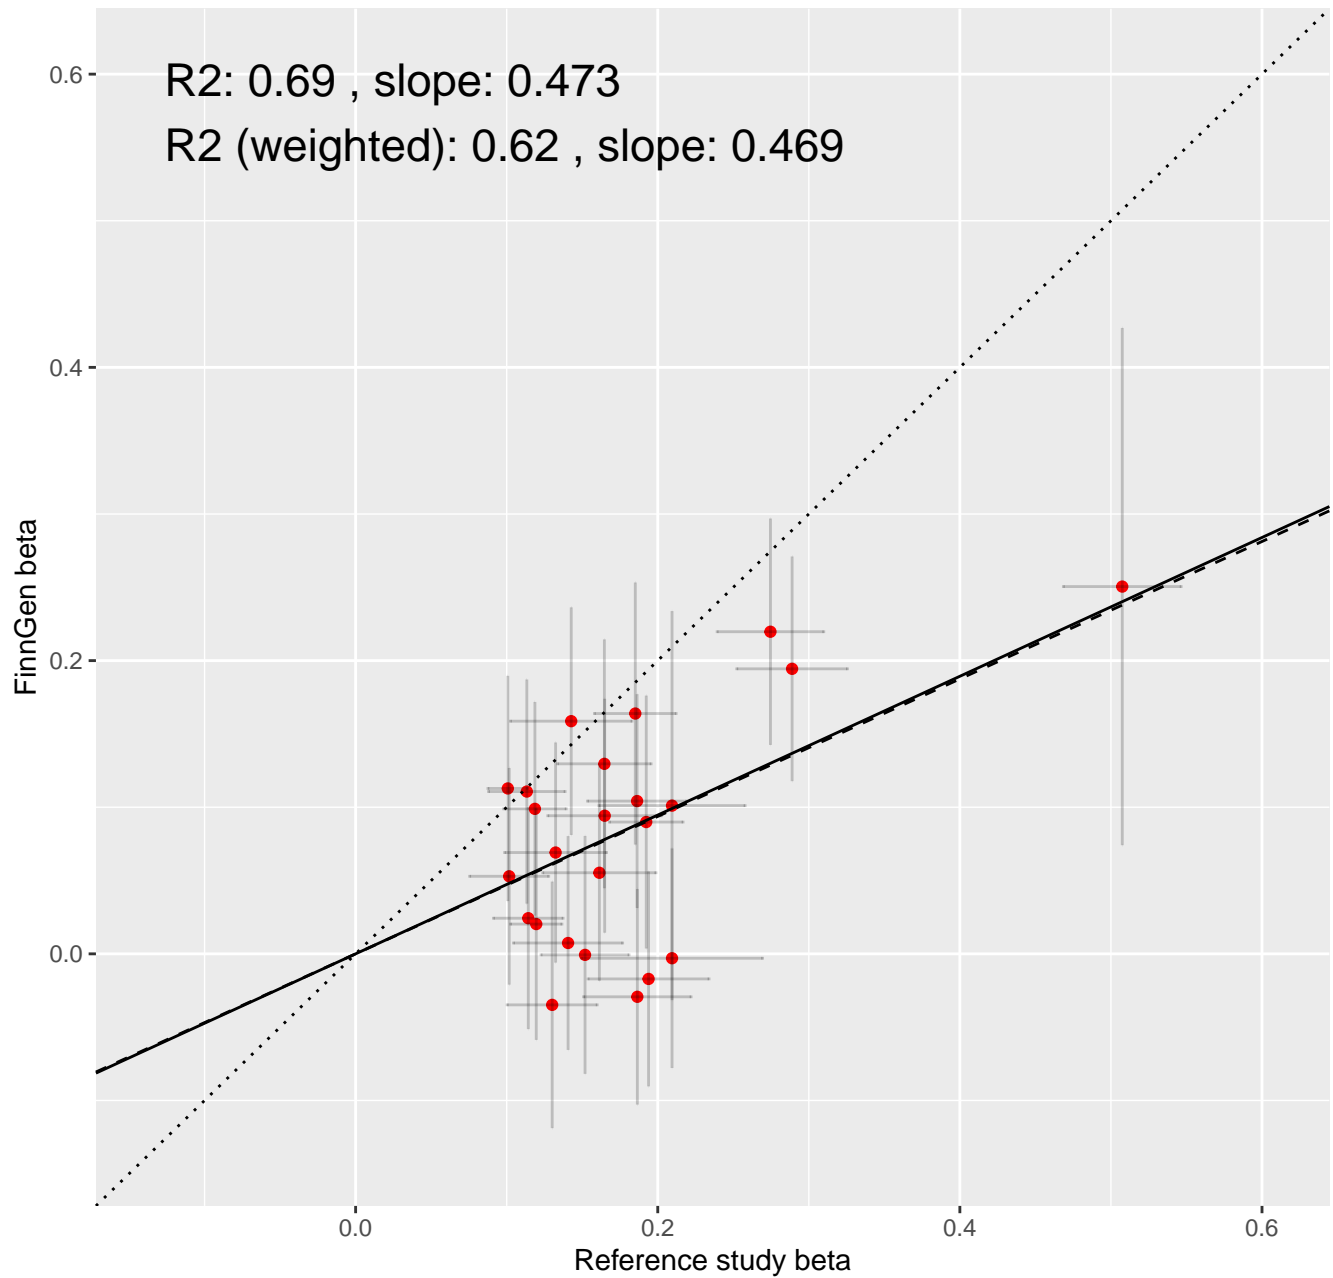

# RHEUMA\_SEROPOS

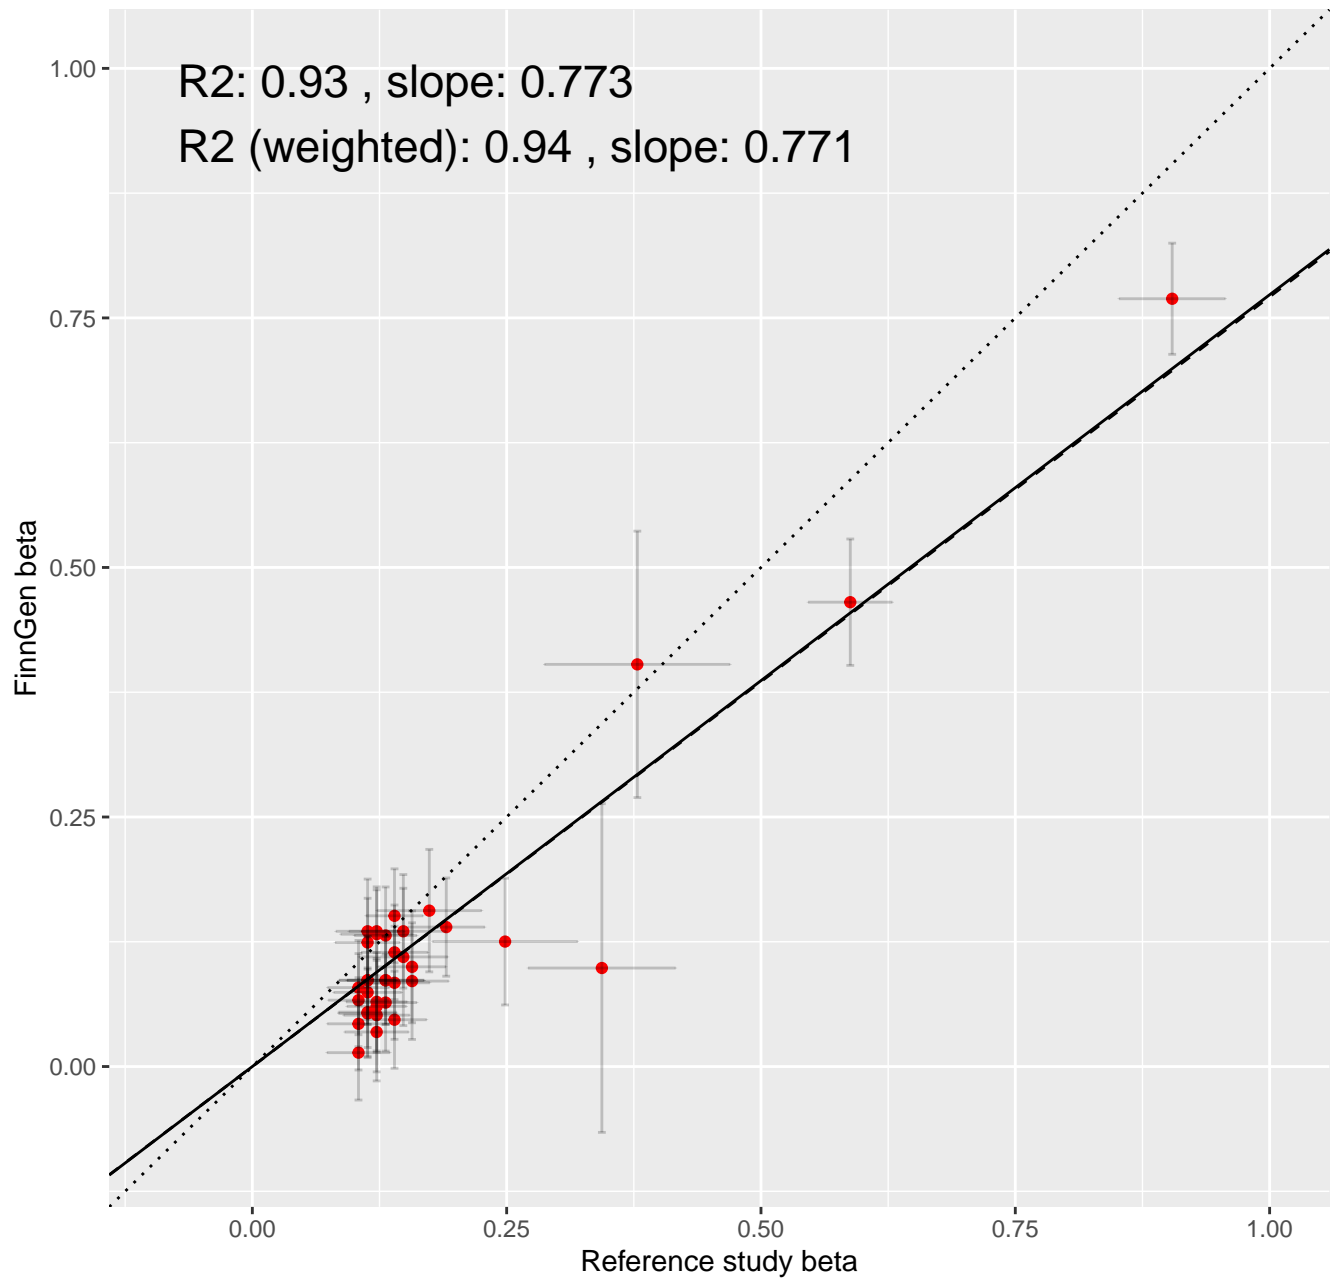

# T1D

R2: 0.95 , slope: 0.717

R2 (weighted): 0.94 , slope: 0.733

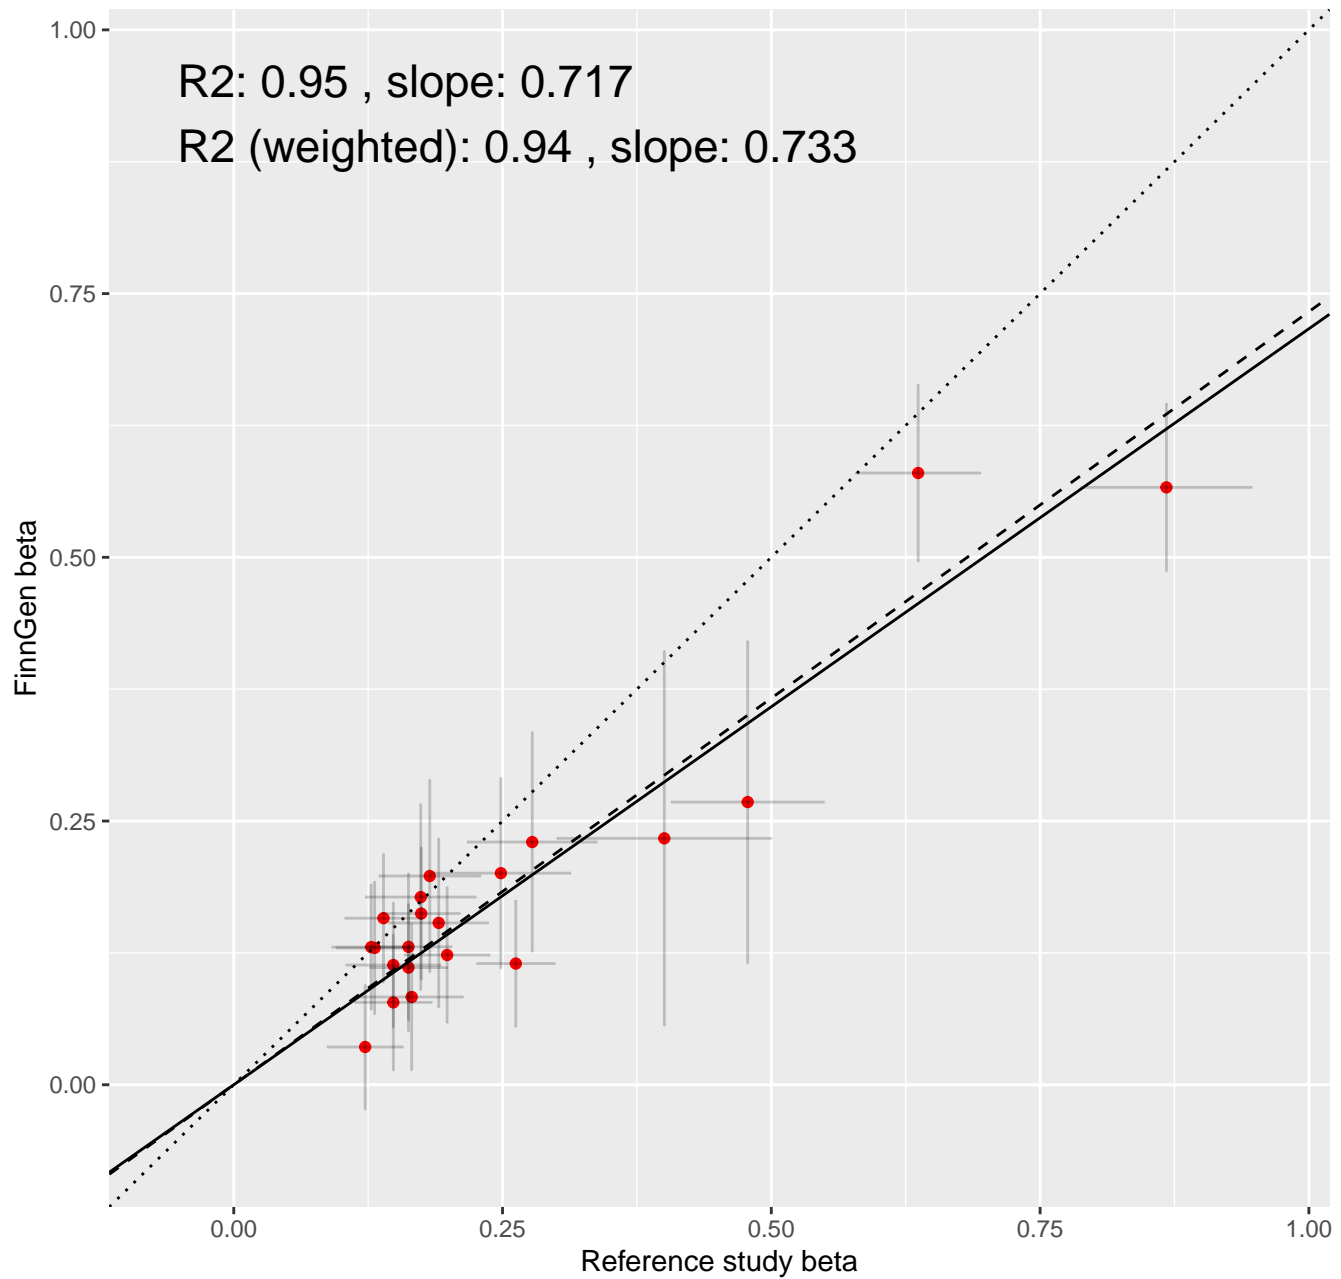

# T2D

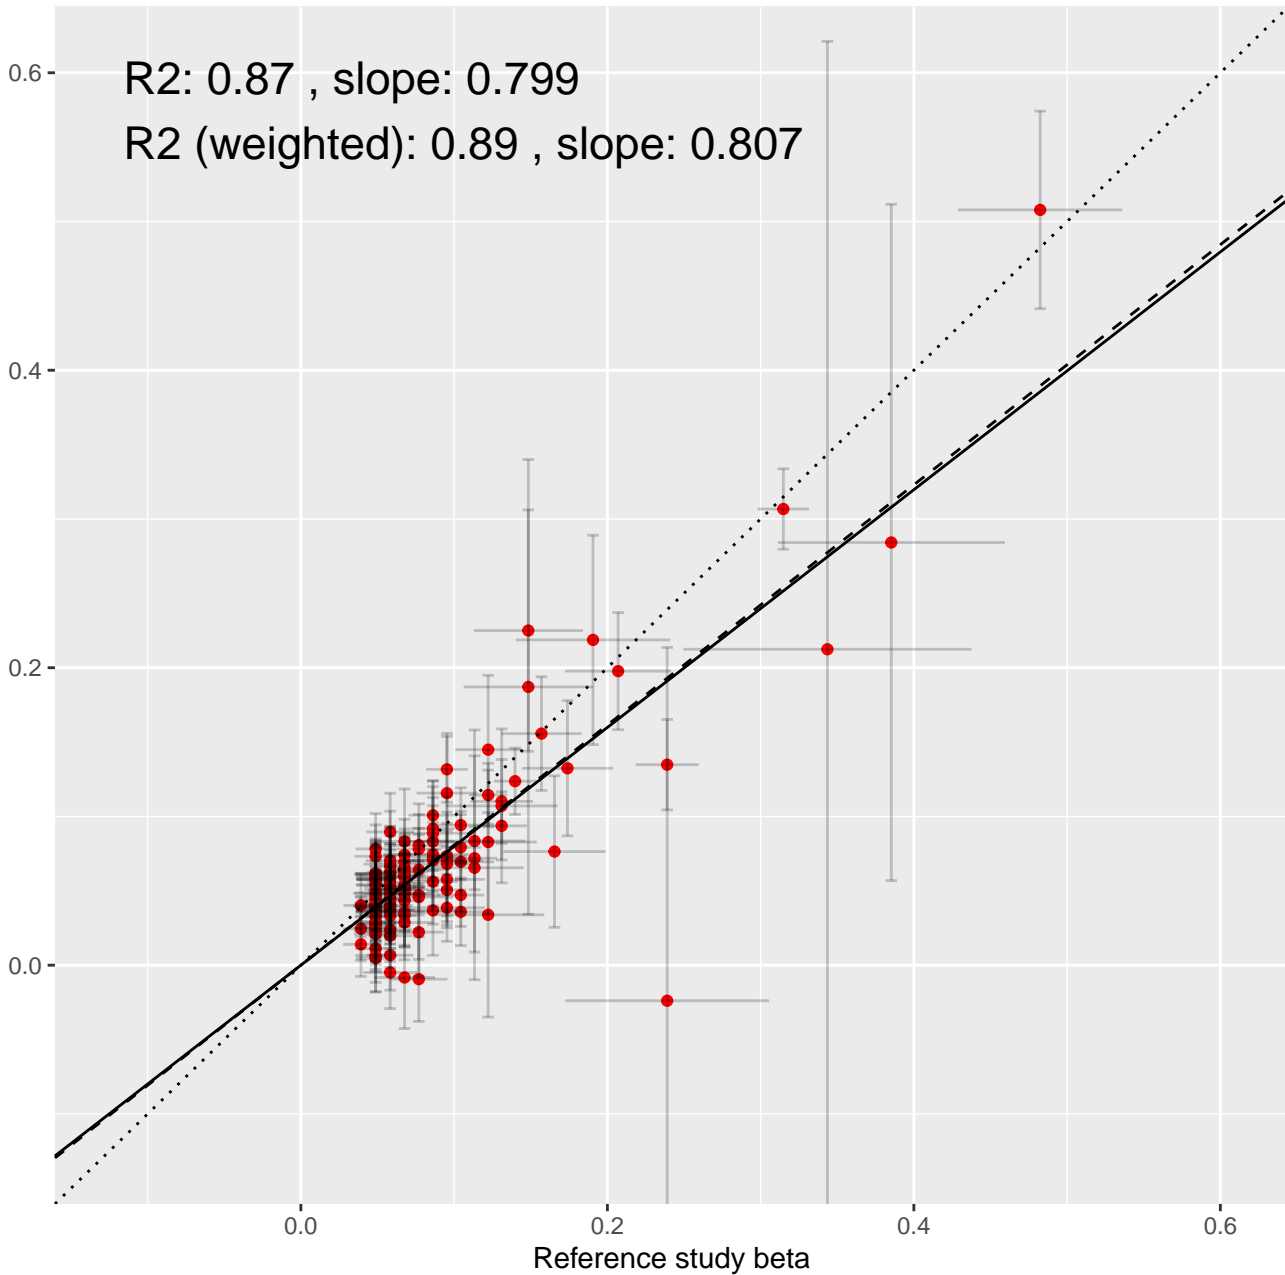

Supplement: Supplementary file [file media-2.pdf]
